# Supplementary material for: Outcomes of Hospitalizations for Cardiogenic Shock at Left Ventricular Assist Device Versus Non–Left Ventricular Assist Device Centers
Source: PubMed Central journal article supplement — J Am Heart Assoc. 2020 Nov 23;9(23):e017326. doi: 10.1161/JAHA.120.017326 (PMC7763759; doi:10.1161/jaha.120.017326), 2020-11-23
Supplement: JAH3-9-e017326-s001.pdf [file JAH3-9-e017326-s001.pdf]

# **SUPPLEMENTAL MATERIAL**

**Table S1. International Classification of Diseases, Ninth Revision, Clinical Modification (ICD-9-CM) codes and Clinical Classification Software (CCS) codes for identification of Comorbidities in the Nationwide Inpatient Sample.**

| Comorbid Conditions/Procedures            | Code                                                                                    |
|-------------------------------------------|-----------------------------------------------------------------------------------------|
| Left ventricular assist device            | ICD-9-CM 37.66                                                                          |
| Heart transplantation                     | ICD-9-CM 33.6, 37.51                                                                    |
| Acute myocardial infarction               | ICD-9-CM 410.01, 410.11, 410.21, 410.31, 410.41, 410.51, 410.61, 410.71, 410.81, 410.91 |
| Cardiogenic shock                         | ICD-9-CM 785.51                                                                         |
| Percutaneous coronary intervention        | ICD-9-CM 00.66, 36.06, 36.07                                                            |
| Coronary artery bypass surgery            | ICD-9-CM 36.10, 36.11, 36.12, 36.13, 36.14, 36.15, 36.16, 36.17, 36.19                  |
| Extracorporeal membrane oxygenation       | ICD-9-CM 39.65                                                                          |
| Percutaneous mechanical support           | ICD-9-CM 37.68                                                                          |
| Intra-aortic balloon pump                 | ICD-9-CM 37.61                                                                          |
| Pulmonary artery catheter placement       | ICD-9-CM 89.63, 89.64, 89.66, 89.67, 89.68                                              |
| Mechanical ventilation                    | ICD-9-CM 96.70, 96.71, 96.72                                                            |
| Coronary artery disease                   | ICD-9-CM 414.00, 414.01, 414.02, 414.03, 414.04, 414.05, 414.06, 414.07                 |
| Prior myocardial infarction               | ICD-9-CM 412                                                                            |
| Prior percutaneous coronary intervention  | ICD-9-CM V45.82                                                                         |
| Prior coronary artery bypass surgery      | ICD-9-CM V45.81                                                                         |
| Family history of coronary artery disease | ICD-9-CM V17.3                                                                          |
| Cardiac arrest                            | ICD-9-CM 99.60, 99.62, 99.63                                                            |

**Table S2. Additional baseline characteristics.**

|                                     | <b>Overall<br/>(n =<br/>272,075)</b> | <b>LVAD<br/>Hospital<br/>(n = 70,685)</b> | <b>Non-LVAD<br/>Hospital<br/>(n = 201,390)</b> | <b>P<br/>value</b> | <b>Std Diff<br/>(%)</b> |
|-------------------------------------|--------------------------------------|-------------------------------------------|------------------------------------------------|--------------------|-------------------------|
| <b>≥75 years</b>                    | 34.9                                 | 26.3                                      | 38.0                                           | <0.001             | 25.3                    |
| <b>Race</b>                         |                                      |                                           |                                                | <0.001             |                         |
| White                               | 66.0                                 | 59.8                                      | 68.2                                           |                    | 17.4                    |
| Black                               | 13.0                                 | 17.1                                      | 11.5                                           |                    | 15.9                    |
| Hispanic                            | 7.7                                  | 5.3                                       | 8.6                                            |                    | 13.0                    |
| Asian or Pacific Islander           | 2.9                                  | 2.2                                       | 3.2                                            |                    | 5.8                     |
| Native American                     | 0.6                                  | 0.5                                       | 0.6                                            |                    | 0.8                     |
| Other                               | 3.5                                  | 5.3                                       | 2.9                                            |                    | 12.0                    |
| Unknown/missing                     | 6.3                                  | 9.8                                       | 5.0                                            |                    | 18.1                    |
| <b>Primary/expected payer</b>       |                                      |                                           |                                                | <0.001             |                         |
| Medicare                            | 63.4                                 | 57.8                                      | 65.4                                           |                    | 15.7                    |
| Medicaid                            | 9.7                                  | 11.2                                      | 9.1                                            |                    | 7.0                     |
| Private insurance                   | 18.7                                 | 23.3                                      | 17.1                                           |                    | 15.6                    |
| Self-pay                            | 5.0                                  | 4.2                                       | 5.3                                            |                    | 5.3                     |
| No charge                           | 0.4                                  | 0.4                                       | 0.4                                            |                    | 0.1                     |
| Other                               | 2.7                                  | 2.9                                       | 2.6                                            |                    | 1.8                     |
| Unknown/missing                     | 0.2                                  | 0.3                                       | 0.2                                            |                    | 1.6                     |
| <b>Median household income</b>      |                                      |                                           |                                                | <0.072             |                         |
| 0-25th percentile                   | 29.5                                 | 29.0                                      | 29.6                                           |                    | 1.2                     |
| 26th-50th percentile                | 25.9                                 | 24.4                                      | 26.5                                           |                    | 4.7                     |
| 51st-75th percentile                | 22.8                                 | 22.9                                      | 22.7                                           |                    | 0.3                     |
| 76th-100th percentile               | 19.6                                 | 21.4                                      | 18.9                                           |                    | 6.2                     |
| Unknown/missing                     | 2.3                                  | 2.3                                       | 2.3                                            |                    |                         |
| <b>Elixhauser co-morbidities</b>    |                                      |                                           |                                                |                    |                         |
| AIDS                                | 0.2                                  | 0.2                                       | 0.1                                            | 0.034              | 2.0                     |
| Alcohol abuse                       | 5.5                                  | 5.1                                       | 5.6                                            | 0.023              | 2.5                     |
| Collagen vascular disease           | 2.6                                  | 2.7                                       | 2.6                                            | 0.724              | 0.4                     |
| Chronic blood loss anemia           | 1.2                                  | 1.2                                       | 1.1                                            | 0.807              | 0.3                     |
| Depression                          | 7.0                                  | 7.1                                       | 7.0                                            | 0.571              | 0.7                     |
| Drug abuse                          | 3.8                                  | 3.9                                       | 3.7                                            | 0.449              | 0.9                     |
| Hypothyroidism                      | 11.8                                 | 11.2                                      | 11.9                                           | 0.076              | 2.2                     |
| Lymphoma                            | 1.1                                  | 1.4                                       | 1.0                                            | 0.001              | 3.3                     |
| Metastatic cancer                   | 2.0                                  | 2.0                                       | 2.0                                            | 0.836              | 0.2                     |
| Other neurological disorders        | 9.5                                  | 8.4                                       | 9.9                                            | <0.001             | 5.1                     |
| Paralysis                           | 3.1                                  | 3.0                                       | 3.2                                            | 0.168              | 1.4                     |
| Peptic ulcer disease (non-bleeding) | <0.1                                 | <0.1                                      | <0.1                                           | 0.213              | 1.1                     |
| Psychoses                           | 3.4                                  | 3.3                                       | 3.4                                            | 0.790              | 0.3                     |
| Solid tumor without metastasis      | 2.2                                  | 2.2                                       | 2.2                                            | 0.748              | 0.3                     |

Data are listed as percentages. AIDS = acquired immunodeficiency syndrome.

**Table S3. Baseline characteristics in acute myocardial infarction subgroup.**

|                                           | <b>Overall<br/>(n =<br/>129,330)</b> | <b>LVAD<br/>Hospital<br/>(n = 26,650)</b> | <b>Non-LVAD<br/>Hospital<br/>(n = 102,680)</b> | <b>P<br/>value</b> | <b>Std<br/>Diff<br/>(%)</b> |
|-------------------------------------------|--------------------------------------|-------------------------------------------|------------------------------------------------|--------------------|-----------------------------|
| <b>Age</b>                                | 69.0 ± 13.3                          | 66.9 ± 13.2                               | 69.5 ± 13.2                                    | <0.001             | 8.9                         |
| <b>≥ 75 yrs</b>                           | 37.2                                 | 30.5                                      | 39.0                                           | <0.001             | 17.8                        |
| <b>Female</b>                             | 38.4                                 | 36.4                                      | 38.9                                           | 0.001              | 5.2                         |
| <b>Race</b>                               |                                      |                                           |                                                | <0.001             |                             |
| White                                     | 69.6                                 | 64.6                                      | 70.8                                           |                    | 13.3                        |
| Black                                     | 9.0                                  | 11.5                                      | 8.3                                            |                    | 10.7                        |
| Hispanic                                  | 7.6                                  | 5.4                                       | 8.2                                            |                    | 11.2                        |
| Asian or Pacific Islander                 | 3.2                                  | 2.6                                       | 3.3                                            |                    | 4.2                         |
| Native American                           | 0.5                                  | 0.6                                       | 0.5                                            |                    | 1.0                         |
| Other                                     | 3.8                                  | 5.7                                       | 3.3                                            |                    | 11.8                        |
| Unknown/missing                           | 6.4                                  | 9.6                                       | 5.6                                            |                    | 15.3                        |
| <b>Primary/expected payer</b>             |                                      |                                           |                                                | <0.001             |                             |
| Medicare                                  | 63.5                                 | 59.3                                      | 64.6                                           |                    | 10.9                        |
| Medicaid                                  | 8.0                                  | 9.1                                       | 7.8                                            |                    | 4.7                         |
| Private insurance                         | 19.7                                 | 22.8                                      | 18.8                                           |                    | 9.9                         |
| Self-pay                                  | 5.5                                  | 4.9                                       | 5.7                                            |                    | 3.4                         |
| No charge                                 | 0.4                                  | 0.4                                       | 0.4                                            |                    | 0.3                         |
| Other                                     | 2.7                                  | 3.2                                       | 2.5                                            |                    | 3.7                         |
| Unknown/missing                           | 0.2                                  | 0.3                                       | 0.2                                            |                    | 2.3                         |
| <b>Median household income</b>            |                                      |                                           |                                                | 0.019              |                             |
| 0-25th percentile                         | 28.8                                 | 28.4                                      | 28.9                                           |                    | 1.3                         |
| 26th-50th percentile                      | 26.4                                 | 24.1                                      | 26.9                                           |                    | 6.5                         |
| 51st-75th percentile                      | 22.9                                 | 22.7                                      | 23.0                                           |                    | 0.6                         |
| 76th-100th percentile                     | 19.5                                 | 22.4                                      | 18.8                                           |                    | 9.0                         |
| Unknown/missing                           | 2.4                                  | 2.4                                       | 2.4                                            |                    | 0.4                         |
| <b>Weekend admission</b>                  | 26.8                                 | 24.9                                      | 27.2                                           | 0.001              | 5.3                         |
| <b>Hospital characteristics</b>           |                                      |                                           |                                                |                    |                             |
| Bed size                                  |                                      |                                           |                                                | <0.001             |                             |
| Small                                     | 9.3                                  | 1.0                                       | 11.4                                           |                    | 44.2                        |
| Medium                                    | 24.9                                 | 8.7                                       | 29.0                                           |                    | 53.8                        |
| Large                                     | 65.9                                 | 90.3                                      | 59.6                                           |                    | 75.8                        |
| Urban Location                            | 94.7                                 | 99.9                                      | 93.4                                           | <0.001             | 36.7                        |
| Teaching Hospital                         | 63.2                                 | 97.1                                      | 54.4                                           | <0.001             | 114.9                       |
| Region                                    |                                      |                                           |                                                | <0.001             |                             |
| Northeast                                 | 17.8                                 | 25.3                                      | 15.8                                           |                    | 23.8                        |
| Midwest                                   | 21.5                                 | 21.5                                      | 21.5                                           |                    | 0.1                         |
| South                                     | 40.0                                 | 39.9                                      | 40.0                                           |                    | 0.2                         |
| West                                      | 20.8                                 | 13.2                                      | 22.7                                           |                    | 25                          |
| <b>Cardiac Comorbidities</b>              |                                      |                                           |                                                |                    |                             |
| Known coronary artery disease             | 69.9                                 | 71.9                                      | 69.4                                           | 0.010              | 5.6                         |
| Family history of coronary artery disease | 4.6                                  | 4.5                                       | 4.6                                            | 0.793              | 0.5                         |
| Prior myocardial infarction               | 9.4                                  | 9.3                                       | 9.5                                            | 0.779              | 0.5                         |

|                                          |      |      |      |        |      |
|------------------------------------------|------|------|------|--------|------|
| Prior percutaneous coronary intervention | 10.2 | 11.9 | 9.8  | <0.001 | 6.8  |
| Prior coronary artery bypass surgery     | 6.1  | 6.7  | 6.0  | 0.088  | 2.8  |
| <b>Elixhauser Comorbidities</b>          |      |      |      |        |      |
| AIDS                                     | 0.1  | 0.1  | 0.1  | 0.782  | 0.4  |
| Alcohol abuse                            | 4.5  | 4.5  | 4.4  | 0.764  | 0.5  |
| Collagen vascular disease                | 2.3  | 2.0  | 2.4  | 0.084  | 2.9  |
| Congestive heart failure                 | 15.4 | 16.5 | 15.1 | 0.031  | 3.8  |
| Chronic blood loss anemia                | 1.2  | 1.1  | 1.2  | 0.669  | 0.8  |
| Chronic pulmonary disease                | 23.4 | 20.4 | 24.2 | <0.001 | 9.3  |
| Coagulopathy                             | 18.3 | 22.3 | 17.2 | <0.001 | 12.8 |
| Deficiency anemias                       | 22.6 | 20.2 | 23.2 | 0.001  | 7.4  |
| Depression                               | 6.0  | 5.6  | 6.1  | 0.254  | 1.9  |
| Diabetes (uncomplicated)                 | 29.2 | 29.2 | 29.2 | 0.944  | 0.1  |
| Diabetes with complications              | 8.0  | 7.4  | 8.1  | 0.137  | 2.6  |
| Drug abuse                               | 2.7  | 2.8  | 2.7  | 0.730  | 0.6  |
| Hypertension                             | 61.2 | 60.4 | 61.4 | 0.262  | 2.1  |
| Hypothyroidism                           | 10.5 | 9.4  | 10.8 | 0.008  | 4.5  |
| Liver disease                            | 2.7  | 3.2  | 2.6  | 0.033  | 3.4  |
| Lymphoma                                 | 0.7  | 0.8  | 0.7  | 0.784  | 0.4  |
| Fluid and electrolyte disorders          | 56.9 | 60.2 | 56.0 | <0.001 | 8.4  |
| Metastatic cancer                        | 1.5  | 1.6  | 1.5  | 0.328  | 1.5  |
| Other neurological disorders             | 8.9  | 8.3  | 9.0  | 0.189  | 2.3  |
| Obesity                                  | 13.1 | 13.0 | 13.1 | 0.933  | 0.2  |
| Paralysis                                | 3.1  | 2.8  | 3.2  | 0.153  | 2.3  |
| Peripheral vascular disease              | 15.3 | 16.5 | 14.9 | 0.008  | 4.5  |
| Peptic ulcer disease (non-bleeding)      | <0.1 | 0.0  | <0.1 | 0.257  | 2.2  |
| Pulmonary circulation disorders          | 3.0  | 3.5  | 2.8  | 0.019  | 3.8  |
| Psychoses                                | 2.8  | 2.7  | 2.8  | 0.693  | 0.6  |
| Renal failure (chronic)                  | 27.3 | 26.5 | 27.5 | 0.240  | 2.1  |
| Solid tumor without metastasis           | 1.9  | 2.0  | 1.9  | 0.605  | 0.8  |
| Valvular disease                         | 4.2  | 5.0  | 4.0  | 0.004  | 4.7  |
| Weight loss                              | 10.3 | 12.3 | 9.8  | <0.001 | 8.2  |
| ≥3 Elixhauser comorbidities              | 68.7 | 70.3 | 68.2 | 0.042  | 4.6  |

Mean ± standard deviation for age, otherwise percentages. AIDS = acquired immunodeficiency syndrome.

**Table S4. Procedures in acute myocardial infarction subgroup.**

|                                            | <b>Overall<br/>(n = 129,330)</b> | <b>LVAD<br/>Hospital<br/>(n = 26,650)</b> | <b>Non-LVAD<br/>Hospital<br/>(n = 102,680)</b> | <b>P<br/>value</b> | <b>Std<br/>Diff<br/>(%)</b> |
|--------------------------------------------|----------------------------------|-------------------------------------------|------------------------------------------------|--------------------|-----------------------------|
| <b>Procedures</b>                          |                                  |                                           |                                                |                    |                             |
| CPR or intubated <24 hours of admission    | 36.4                             | 35.5                                      | 36.7                                           | 0.235              | 2.4                         |
| IABP                                       | 31.8                             | 33.2                                      | 31.4                                           | 0.085              | 3.8                         |
| Percutaneous support (Impella/TandemHeart) | 3.4                              | 4.6                                       | 3.1                                            | <0.001             | 7.7                         |
| ECMO                                       | 1.1                              | 4.4                                       | 0.2                                            | <0.001             | 28.0                        |
| PCI or CABG                                | 52.8                             | 53.6                                      | 52.6                                           | 0.272              | 2.0                         |
| CABG                                       | 13.1                             | 18.5                                      | 11.7                                           | <0.001             | 19.2                        |
| PCI                                        | 42.0                             | 37.4                                      | 43.2                                           | <0.001             | 11.9                        |
| Mechanical Ventilation                     | 52.4                             | 53.7                                      | 52.1                                           | 0.096              | 3.3                         |
| Pulmonary Artery Catheter                  | 6.3                              | 12.8                                      | 4.7                                            | <0.001             | 29.1                        |

AMI = acute myocardial infarction; CS = cardiogenic shock; CPR = cardiopulmonary resuscitation; IABP = intra-aortic balloon pump; PCI = percutaneous coronary intervention; CABG = coronary artery bypass graft.

**Table S5. Baseline characteristics in non-acute myocardial infarction subgroup.**

|                                           | <b>Overall<br/>(n =<br/>142,745)</b> | <b>LVAD<br/>Hospital<br/>(n = 44,035)</b> | <b>Non-LVAD<br/>Hospital<br/>(n = 98,710)</b> | <b>P<br/>value</b> | <b>Std<br/>Diff<br/>(%)</b> |
|-------------------------------------------|--------------------------------------|-------------------------------------------|-----------------------------------------------|--------------------|-----------------------------|
| <b>Age</b>                                | 66.1 ± 15.4                          | 62.4 ± 15.9                               | 67.7 ± 14.9                                   | <0.001             | 15.4                        |
| <b>≥ 75 yrs</b>                           | 32.9                                 | 23.7                                      | 37.0                                          | <0.001             | 29.2                        |
| <b>Female</b>                             | 40.7                                 | 39.0                                      | 41.4                                          | <0.001             | 4.9                         |
| <b>Race</b>                               |                                      |                                           |                                               | <0.001             |                             |
| White                                     | 62.8                                 | 56.9                                      | 65.4                                          |                    | 17.5                        |
| Black                                     | 16.6                                 | 20.5                                      | 14.9                                          |                    | 14.6                        |
| Hispanic                                  | 7.8                                  | 5.2                                       | 8.9                                           |                    | 14.6                        |
| Asian or Pacific Islander                 | 2.8                                  | 2.0                                       | 3.1                                           |                    | 6.6                         |
| Native American                           | 0.6                                  | 0.5                                       | 0.6                                           |                    | 2.2                         |
| Other                                     | 3.3                                  | 5.0                                       | 2.5                                           |                    | 13.1                        |
| Unknown/missing                           | 6.2                                  | 9.9                                       | 4.5                                           |                    | 20.8                        |
| <b>Primary/expected payer</b>             |                                      |                                           |                                               | <0.001             |                             |
| Medicare                                  | 63.3                                 | 56.8                                      | 66.2                                          |                    | 19.3                        |
| Medicaid                                  | 11.1                                 | 12.5                                      | 10.5                                          |                    | 6.3                         |
| Private insurance                         | 17.9                                 | 23.6                                      | 15.3                                          |                    | 21.3                        |
| Self-pay                                  | 4.6                                  | 3.7                                       | 4.9                                           |                    | 5.9                         |
| No charge                                 | 0.3                                  | 0.3                                       | 0.3                                           |                    | 0.3                         |
| Other                                     | 2.6                                  | 2.7                                       | 2.6                                           |                    | 0.4                         |
| Unknown/missing                           | 0.2                                  | 0.3                                       | 0.2                                           |                    | 1.1                         |
| <b>Median household income</b>            |                                      |                                           |                                               | 0.270              |                             |
| 0-25th percentile                         | 30.0                                 | 29.4                                      | 30.3                                          |                    | 1.9                         |
| 26th-50th percentile                      | 25.5                                 | 24.6                                      | 25.9                                          |                    | 3.2                         |
| 51st-75th percentile                      | 22.6                                 | 23.0                                      | 22.5                                          |                    | 1.1                         |
| 76th-100th percentile                     | 19.6                                 | 20.8                                      | 19.0                                          |                    | 4.4                         |
| Unknown/missing                           | 2.2                                  | 2.2                                       | 2.2                                           |                    | 0                           |
| <b>Weekend admission</b>                  | 24.4                                 | 22.4                                      | 25.3                                          | <0.001             | 6.9                         |
| <b>Hospital characteristics</b>           |                                      |                                           |                                               |                    |                             |
| Bed size                                  |                                      |                                           |                                               | <0.001             |                             |
| Small                                     | 9.4                                  | 0.7                                       | 13.3                                          |                    | 50.8                        |
| Medium                                    | 22.4                                 | 7.5                                       | 29.1                                          |                    | 58                          |
| Large                                     | 68.2                                 | 91.7                                      | 57.7                                          |                    | 85.2                        |
| Urban Location                            | 96.0                                 | >99.9                                     | 94.2                                          | <0.001             | 34.7                        |
| Teaching Hospital                         | 70.2                                 | 98.7                                      | 57.5                                          | <0.001             | 115                         |
| Region                                    |                                      |                                           |                                               | <0.001             |                             |
| Northeast                                 | 18.1                                 | 23.0                                      | 15.9                                          |                    | 18                          |
| Midwest                                   | 21.1                                 | 23.8                                      | 19.9                                          |                    | 9.5                         |
| South                                     | 39.3                                 | 39.6                                      | 39.2                                          |                    | 0.7                         |
| West                                      | 24.4                                 | 13.6                                      | 24.9                                          |                    | 29.1                        |
| <b>Cardiac Comorbidities</b>              |                                      |                                           |                                               |                    |                             |
| Known coronary artery disease             | 39.4                                 | 37.9                                      | 40.1                                          | 0.010              | 4.6                         |
| Family history of coronary artery disease | 1.8                                  | 2.2                                       | 1.6                                           | 0.006              | 4.4                         |
| Prior myocardial infarction               | 10.4                                 | 10.9                                      | 10.1                                          | 0.112              | 2.3                         |

|                                          |      |      |      |        |      |
|------------------------------------------|------|------|------|--------|------|
| Prior percutaneous coronary intervention | 7.4  | 8.1  | 7.1  | 0.021  | 3.6  |
| Prior coronary artery bypass surgery     | 8.8  | 8.5  | 8.9  | 0.315  | 1.5  |
| <b>Elixhauser Comorbidities</b>          |      |      |      |        |      |
| AIDS                                     | 0.2  | 0.3  | 0.2  | 0.046  | 2.5  |
| Alcohol abuse                            | 6.4  | 5.4  | 6.9  | <0.001 | 6.1  |
| Collagen vascular disease                | 2.9  | 3.1  | 2.8  | 0.256  | 1.6  |
| Congestive heart failure                 | 32.2 | 29.4 | 33.4 | <0.001 | 8.7  |
| Chronic blood loss anemia                | 1.1  | 1.2  | 1.1  | 0.368  | 1.3  |
| Chronic pulmonary disease                | 26.8 | 22.9 | 28.5 | <0.001 | 12.6 |
| Coagulopathy                             | 23.3 | 26.9 | 21.7 | <0.001 | 12.2 |
| Deficiency anemias                       | 25.4 | 22.7 | 26.5 | <0.001 | 8.9  |
| Depression                               | 7.9  | 8.1  | 7.9  | 0.646  | 0.7  |
| Diabetes (uncomplicated)                 | 25.8 | 24.6 | 26.3 | 0.015  | 3.9  |
| Diabetes with complications              | 7.8  | 6.3  | 8.5  | <0.001 | 8.6  |
| Drug abuse                               | 4.7  | 4.6  | 4.8  | 0.436  | 1.2  |
| Hypertension                             | 54.9 | 52.0 | 56.2 | <0.001 | 8.4  |
| Hypothyroidism                           | 12.9 | 12.3 | 13.1 | 0.126  | 2.4  |
| Liver disease                            | 5.9  | 6.3  | 5.8  | 0.123  | 2.2  |
| Lymphoma                                 | 1.4  | 1.7  | 1.3  | 0.005  | 3.5  |
| Fluid and electrolyte disorders          | 66.7 | 65.5 | 67.3 | 0.044  | 3.8  |
| Metastatic cancer                        | 2.5  | 2.3  | 2.6  | 0.130  | 2    |
| Other neurological disorders             | 10.1 | 8.5  | 10.8 | <0.001 | 8    |
| Obesity                                  | 15.1 | 15.1 | 15.1 | 0.950  | 0.1  |
| Paralysis                                | 3.2  | 3.0  | 3.2  | 0.490  | 0.9  |
| Peripheral vascular disease              | 12.5 | 12.1 | 12.7 | 0.249  | 1.8  |
| Peptic ulcer disease (non-bleeding)      | <0.1 | 0.1  | <0.1 | 0.045  | 2.3  |
| Pulmonary circulation disorders          | 9.8  | 10.1 | 9.7  | 0.360  | 1.3  |
| Psychoses                                | 3.9  | 3.7  | 4.0  | 0.299  | 1.4  |
| Renal failure (chronic)                  | 35.0 | 35.8 | 34.7 | 0.182  | 2.3  |
| Solid tumor without metastasis           | 2.4  | 2.3  | 2.4  | 0.616  | 0.7  |
| Valvular disease                         | 9.4  | 8.6  | 9.8  | 0.007  | 4    |
| Weight loss                              | 15.0 | 16.5 | 14.3 | 0.001  | 6.2  |
| ≥3 Elixhauser comorbidities              | 79.9 | 78.2 | 80.6 | 0.015  | 5.8  |

Mean ± standard deviation for age, otherwise percentages. AIDS = acquired immunodeficiency syndrome.



**Table S6. Procedures in non-acute myocardial infarction subgroup.**

|                                            | <b>Overall<br/>(n = 142,745)</b> | <b>LVAD<br/>Hospital<br/>(n = 44,035)</b> | <b>Non-LVAD<br/>Hospital<br/>(n = 98,710)</b> | <b>P<br/>value</b> | <b>Std<br/>Diff<br/>(%)</b> |
|--------------------------------------------|----------------------------------|-------------------------------------------|-----------------------------------------------|--------------------|-----------------------------|
| <b>Procedures</b>                          |                                  |                                           |                                               |                    |                             |
| CPR or intubated <24 hours of admission    | 33.3                             | 28.5                                      | 35.4                                          | <0.001             | 14.9                        |
| IABP                                       | 6.9                              | 9.9                                       | 5.6                                           | <0.001             | 15.9                        |
| Percutaneous support (Impella/TandemHeart) | 0.9                              | 1.5                                       | 0.6                                           | <0.001             | 8.6                         |
| ECMO                                       | 1.5                              | 4.2                                       | 0.2                                           | <0.001             | 27.1                        |
| PCI or CABG                                | 6.8                              | 8.1                                       | 6.2                                           | <0.001             | 7.2                         |
| CABG                                       | 4.7                              | 5.9                                       | 4.1                                           | <0.001             | 8.4                         |
| PCI                                        | 2.3                              | 2.3                                       | 2.3                                           | 0.869              | 0.2                         |
| Mechanical Ventilation                     | 54.6                             | 50.1                                      | 56.6                                          | <0.001             | 12.9                        |
| Pulmonary Artery Catheter                  | 7.6                              | 15.6                                      | 4.0                                           | <0.001             | 39.7                        |

AMI = acute myocardial infarction; CS = cardiogenic shock; CPR = cardiopulmonary resuscitation; IABP = intra-aortic balloon pump; PCI = percutaneous coronary intervention; CABG = coronary artery bypass graft.

**Table S7. Baseline characteristics in LVAD vs. large, non-LVAD, CABG-capable hospitals.**

|                                 | <b>Overall<br/>(n =<br/>171,210)</b> | <b>LVAD<br/>Hospital<br/>(n = 70,685)</b> | <b>Non-LVAD,<br/>CABG-<br/>Capable<br/>Hospital<br/>(n = 100,525)</b> | <b>P<br/>value</b> | <b>Std<br/>Diff<br/>(%)</b> |
|---------------------------------|--------------------------------------|-------------------------------------------|-----------------------------------------------------------------------|--------------------|-----------------------------|
| <b>Age</b>                      | 66.4 ± 14.5                          | 64.1 ± 15.1                               | 68.0 ± 13.9                                                           | <0.001             | 12.0                        |
| <b>≥ 75 yrs</b>                 | 31.7                                 | 26.3                                      | 35.4                                                                  | <0.001             | 20.0                        |
| <b>Female</b>                   | 38.7                                 | 38.0                                      | 39.1                                                                  | 0.049              | 2.3                         |
| <b>Race</b>                     |                                      |                                           |                                                                       | <0.001             |                             |
| White                           | 65.5                                 | 59.8                                      | 69.4                                                                  |                    | 20.2                        |
| Black                           | 13.0                                 | 17.1                                      | 10.1                                                                  |                    | 20.4                        |
| Hispanic                        | 7.2                                  | 5.3                                       | 8.5                                                                   |                    | 12.7                        |
| Asian or Pacific Islander       | 2.8                                  | 2.2                                       | 3.1                                                                   |                    | 5.4                         |
| Native American                 | 0.6                                  | 0.5                                       | 0.6                                                                   |                    | 0.8                         |
| Other                           | 4.0                                  | 5.3                                       | 3.0                                                                   |                    | 11.2                        |
| Unknown/missing                 | 7.1                                  | 9.8                                       | 5.2                                                                   |                    | 17.3                        |
| <b>Primary/expected payer</b>   |                                      |                                           |                                                                       | <0.001             |                             |
| Medicare                        | 61.6                                 | 57.8                                      | 64.3                                                                  |                    | 13.5                        |
| Medicaid                        | 10.3                                 | 11.2                                      | 9.7                                                                   |                    | 5.0                         |
| Private insurance               | 19.8                                 | 23.3                                      | 17.3                                                                  |                    | 15.0                        |
| Self-pay                        | 4.9                                  | 4.2                                       | 5.4                                                                   |                    | 5.6                         |
| No charge                       | 0.4                                  | 0.4                                       | 0.4                                                                   |                    | 0.4                         |
| Other                           | 2.8                                  | 2.9                                       | 2.8                                                                   |                    | 0.6                         |
| Unknown/missing                 | 0.2                                  | 0.3                                       | 0.1                                                                   |                    | 1.3                         |
| <b>Median household income</b>  |                                      |                                           |                                                                       | <0.001             |                             |
| 0-25th percentile               | 30.2                                 | 29.0                                      | 31.1                                                                  |                    | 4.5                         |
| 26th-50th percentile            | 26.3                                 | 24.4                                      | 27.7                                                                  |                    | 7.5                         |
| 51st-75th percentile            | 22.7                                 | 22.9                                      | 22.5                                                                  |                    | 0.9                         |
| 76th-100th percentile           | 18.5                                 | 21.4                                      | 16.5                                                                  |                    | 12.6                        |
| Unknown/missing                 | 2.3                                  | 2.3                                       | 2.2                                                                   |                    | 0.8                         |
| <b>Weekend admission</b>        | 25.3                                 | 23.3                                      | 26.6                                                                  | <0.001             | 7.6                         |
| <b>Hospital characteristics</b> |                                      |                                           |                                                                       |                    |                             |
| <b>Bed size</b>                 |                                      |                                           |                                                                       | <0.001             |                             |
| Small                           | 0.3                                  | 0.8                                       | 0.0                                                                   |                    | 12.9                        |
| Medium                          | 3.3                                  | 8.0                                       | 0.0                                                                   |                    | 41.7                        |
| Large                           | 96.4                                 | 91.2                                      | 100                                                                   |                    | 43.9                        |
| Urban Location                  | 96.7                                 | 99.9                                      | 94.4                                                                  | <0.001             | 33.8                        |
| Teaching Hospital               | 70.9                                 | 98.1                                      | 51.8                                                                  | <0.001             | 126.0                       |
| <b>Region</b>                   |                                      |                                           |                                                                       | <0.001             |                             |
| Northeast                       | 17.2                                 | 23.9                                      | 12.5                                                                  |                    | 30.0                        |
| Midwest                         | 22.6                                 | 22.9                                      | 22.4                                                                  |                    | 1.3                         |
| South                           | 39.1                                 | 39.7                                      | 38.7                                                                  |                    | 2.1                         |
| West                            | 21.1                                 | 13.5                                      | 26.5                                                                  |                    | 33.0                        |
| <b>Cardiac Comorbidities</b>    |                                      |                                           |                                                                       |                    |                             |
| Known coronary artery disease   | 54.8                                 | 50.7                                      | 57.7                                                                  | <0.001             | 14.1                        |

|                                           |      |      |      |        |      |
|-------------------------------------------|------|------|------|--------|------|
| Family history of coronary artery disease | 3.3  | 3.1  | 3.5  | 0.163  | 2.2  |
| Prior myocardial infarction               | 9.9  | 10.3 | 9.7  | 0.184  | 1.9  |
| Prior percutaneous coronary intervention  | 9.1  | 9.5  | 8.8  | 0.102  | 2.3  |
| Prior coronary artery bypass surgery      | 7.5  | 7.8  | 7.3  | 0.099  | 2.1  |
| <b>Elixhauser Comorbidities</b>           |      |      |      |        |      |
| AIDS                                      | 0.2  | 0.2  | 0.1  | 0.011  | 2.7  |
| Alcohol abuse                             | 5.3  | 5.1  | 5.5  | 0.149  | 1.8  |
| Collagen vascular disease                 | 2.6  | 2.7  | 2.5  | 0.306  | 1.3  |
| Congestive heart failure                  | 23.1 | 24.5 | 22.1 | <0.001 | 5.7  |
| Chronic blood loss anemia                 | 1.2  | 1.2  | 1.1  | 0.791  | 0.3  |
| Chronic pulmonary disease                 | 24.2 | 22.0 | 25.8 | <0.001 | 8.9  |
| Coagulopathy                              | 22.2 | 25.2 | 20.2 | <0.001 | 12.0 |
| Deficiency anemias                        | 23.4 | 21.8 | 24.6 | <0.001 | 6.6  |
| Depression                                | 6.8  | 7.1  | 6.6  | 0.136  | 2.1  |
| Diabetes (uncomplicated)                  | 27.4 | 26.3 | 28.2 | 0.004  | 4.1  |
| Diabetes with complications               | 7.6  | 6.7  | 8.3  | <0.001 | 6.0  |
| Drug abuse                                | 3.7  | 3.9  | 3.6  | 0.220  | 1.6  |
| Hypertension                              | 56.9 | 55.1 | 58.2 | <0.001 | 6.2  |
| Hypothyroidism                            | 11.5 | 11.2 | 11.7 | 0.247  | 1.5  |
| Liver disease                             | 4.5  | 5.1  | 4.1  | <0.001 | 4.9  |
| Lymphoma                                  | 1.1  | 1.4  | 1.0  | 0.001  | 3.7  |
| Fluid and electrolyte disorders           | 62.0 | 63.5 | 61.0 | 0.006  | 5.1  |
| Metastatic cancer                         | 1.9  | 2.0  | 1.7  | 0.038  | 2.3  |
| Other neurological disorders              | 8.9  | 8.4  | 9.3  | 0.025  | 2.9  |
| Obesity                                   | 14.4 | 14.3 | 14.4 | 0.832  | 0.3  |
| Paralysis                                 | 3.1  | 3.0  | 3.1  | 0.411  | 0.9  |
| Peripheral vascular disease               | 13.7 | 13.8 | 13.6 | 0.790  | 0.4  |
| Peptic ulcer disease (non-bleeding)       | <0.1 | <0.1 | <0.1 | 0.719  | 0.4  |
| Pulmonary circulation disorders           | 6.4  | 7.6  | 5.5  | <0.001 | 8.4  |
| Psychoses                                 | 3.3  | 3.3  | 3.3  | 0.754  | 0.4  |
| Renal failure (chronic)                   | 31.0 | 32.3 | 30.1 | 0.003  | 4.7  |
| Solid tumor without metastasis            | 2.1  | 2.2  | 2.0  | 0.296  | 1.2  |
| Valvular disease                          | 6.7  | 7.3  | 6.2  | 0.002  | 4.1  |
| Weight loss                               | 12.8 | 14.9 | 11.4 | <0.001 | 10.6 |
| ≥3 Elixhauser comorbidities               | 74.0 | 75.3 | 73.2 | 0.029  | 4.8  |

Mean ± standard deviation for age, otherwise percentages. LVAD = left ventricular assistance device; CABG = coronary artery bypass graft; AIDS = acquired immunodeficiency syndrome.

**Table S8. Case presentations and procedures in LVAD vs. large, non-LVAD, CABG-capable hospitals.**

|                                            | <b>Overall<br/>(n = 171,210)</b> | <b>LVAD<br/>Hospital<br/>(n = 70,685)</b> | <b>Non-LVAD,<br/>CABG-<br/>Capable<br/>Hospital<br/>(n = 100,525)</b> | <b>P<br/>value</b> | <b>Std<br/>Diff<br/>(%)</b> |
|--------------------------------------------|----------------------------------|-------------------------------------------|-----------------------------------------------------------------------|--------------------|-----------------------------|
| <b>Presentation</b>                        |                                  |                                           |                                                                       |                    |                             |
| Non-AMI-CS                                 | 53.5                             | 62.3                                      | 47.2                                                                  | <0.001             | 30.6                        |
| AMI-CS                                     | 46.5                             | 37.7                                      | 52.8                                                                  | <0.001             | 30.6                        |
| <b>Procedures</b>                          |                                  |                                           |                                                                       |                    |                             |
| CPR or intubated <24 hours of admission    | 34.2                             | 31.1                                      | 36.3                                                                  | <0.001             | 11.0                        |
| IABP                                       | 20.4                             | 18.7                                      | 21.6                                                                  | <0.001             | 7.2                         |
| Percutaneous support (Impella/TandemHeart) | 2.6                              | 2.6                                       | 2.5                                                                   | 0.572              | 0.8                         |
| ECMO                                       | 2.0                              | 4.3                                       | 0.3                                                                   | <0.001             | 26.3                        |
| PCI or CABG                                | 30.6                             | 25.2                                      | 34.4                                                                  | <0.001             | 20.2                        |
| CABG                                       | 10.5                             | 10.7                                      | 10.3                                                                  | 0.441              | 1.3                         |
| PCI                                        | 21.6                             | 15.5                                      | 25.8                                                                  | <0.001             | 25.6                        |
| Mechanical Ventilation                     | 53.3                             | 51.5                                      | 54.5                                                                  | <0.001             | 6.1                         |
| Pulmonary Artery Catheter                  | 9.0                              | 14.6                                      | 5.2                                                                   | <0.001             | 31.8                        |

LVAD = left ventricular assistance device; AMI = acute myocardial infarction; CS = cardiogenic shock; CPR = cardiopulmonary resuscitation; IABP = intra-aortic balloon pump; PCI = percutaneous coronary intervention; CABG = coronary artery bypass graft.
